# Supplementary material for: Water masses in the Atlantic Ocean: characteristics and distributions
Source: Copernicus journal article supplement (doi:10.5194/os-17-463-2021), 2021-03-15
Supplement: Supplementary file 1 [file os-17-463-2021-supplement.pdf]

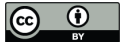

*Supplement of*

## **Water masses in the Atlantic Ocean: characteristics and distributions**

**Mian Liu and Toste Tanhua**

*Correspondence to:* Toste Tanhua (ttanhua@geomar.de)

The copyright of individual parts of the supplement might differ from the article licence.

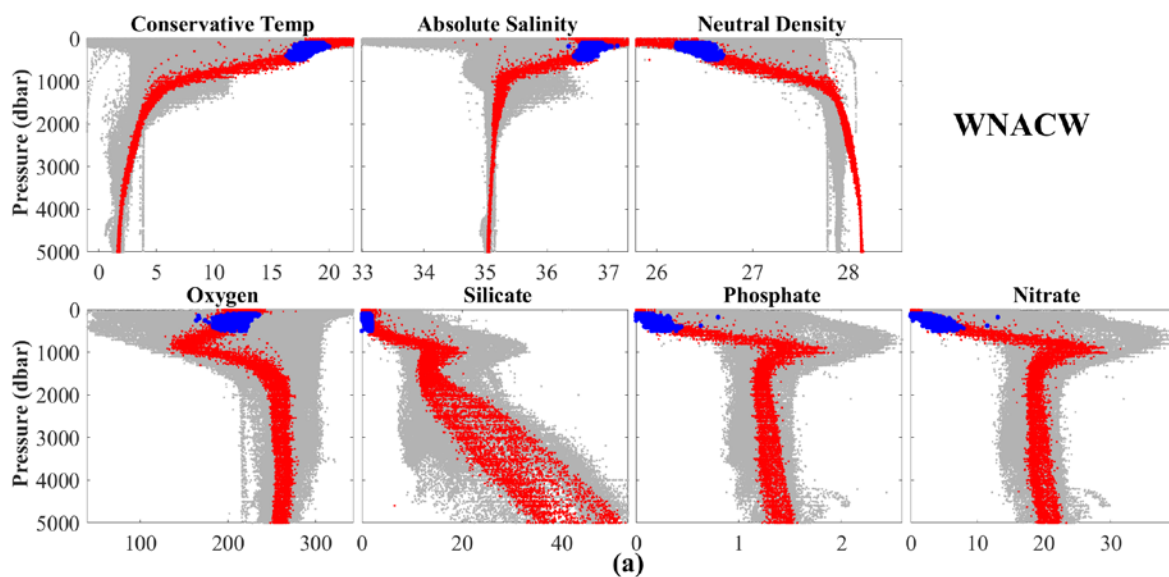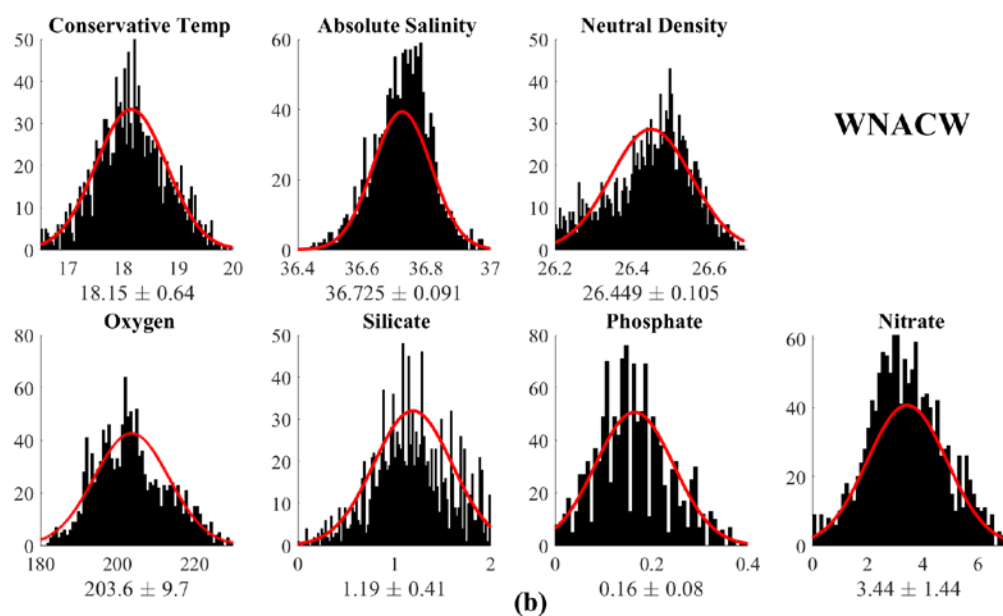

**Figure S1:** Definition of Western North Atlantic Central Water (WNACW): Panel a) the distribution of key properties vs. pressure; Panel b) bar plots of the data distribution of samples used to define the SWTs. Conservative Temperature ( $^{\circ}\text{C}$ ), Absolute Salinity ( $\text{g kg}^{-1}$ ), Neutral Density ( $\text{kg m}^{-3}$ ), Oxygen and Nutrients ( $\mu\text{mol kg}^{-1}$ ). The red Gaussian fit shows mean value and standard deviation of selected data.

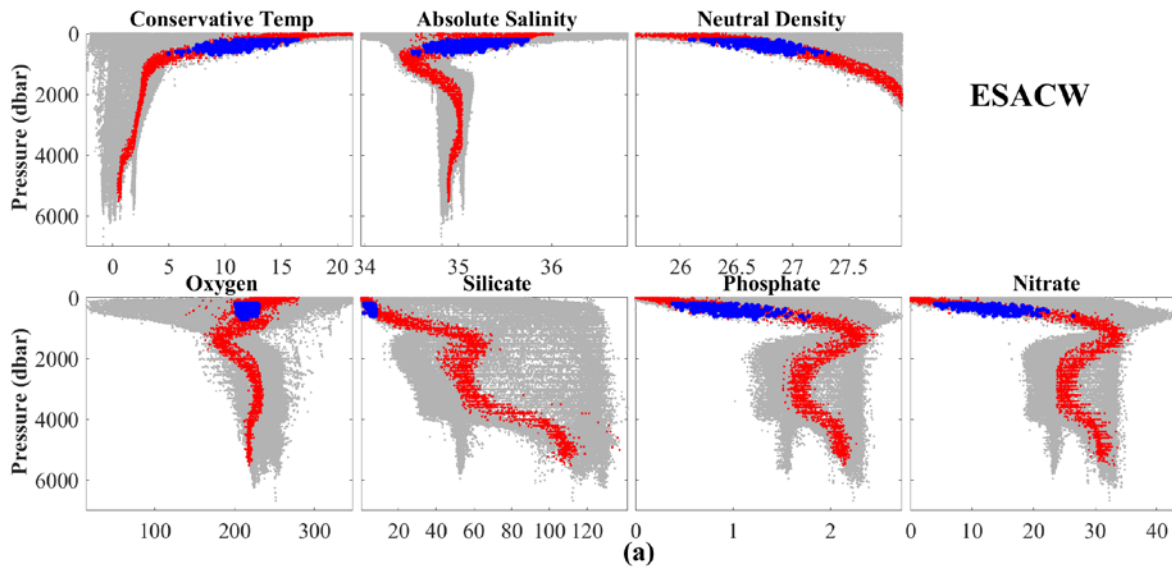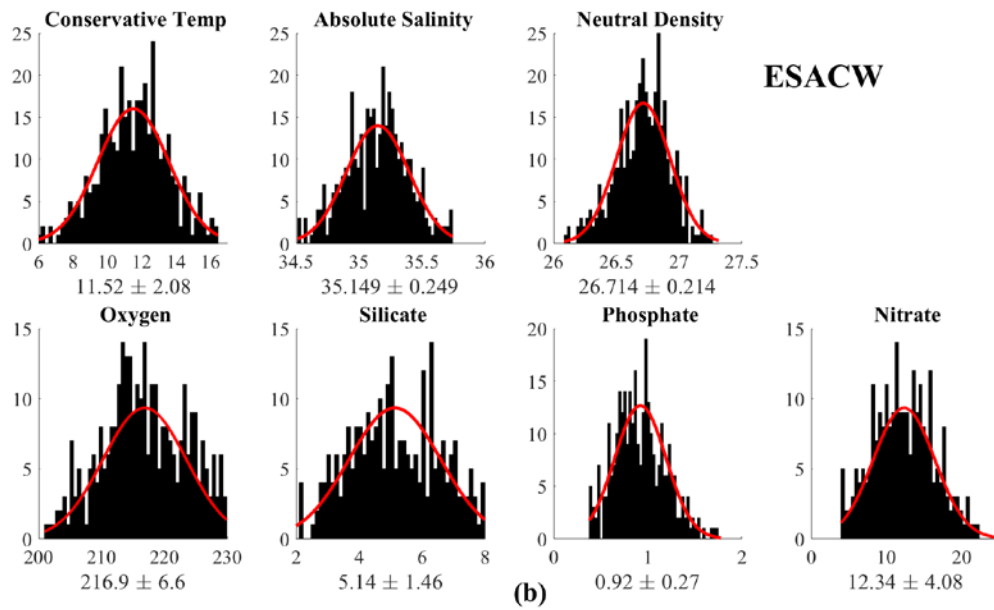

**Figure S2:** Definition of Eastern South Atlantic Central Water (ESACW): Panel a) the distribution of key properties vs. pressure; Panel b) bar plots of the data distribution of samples used to define the SWTs. Conservative Temperature ( $^{\circ}\text{C}$ ), Absolute Salinity ( $\text{g kg}^{-1}$ ), Neutral Density ( $\text{kg m}^{-3}$ ), Oxygen and Nutrients ( $\mu\text{mol kg}^{-1}$ ). The red Gaussian fit shows mean value and standard deviation of selected data.

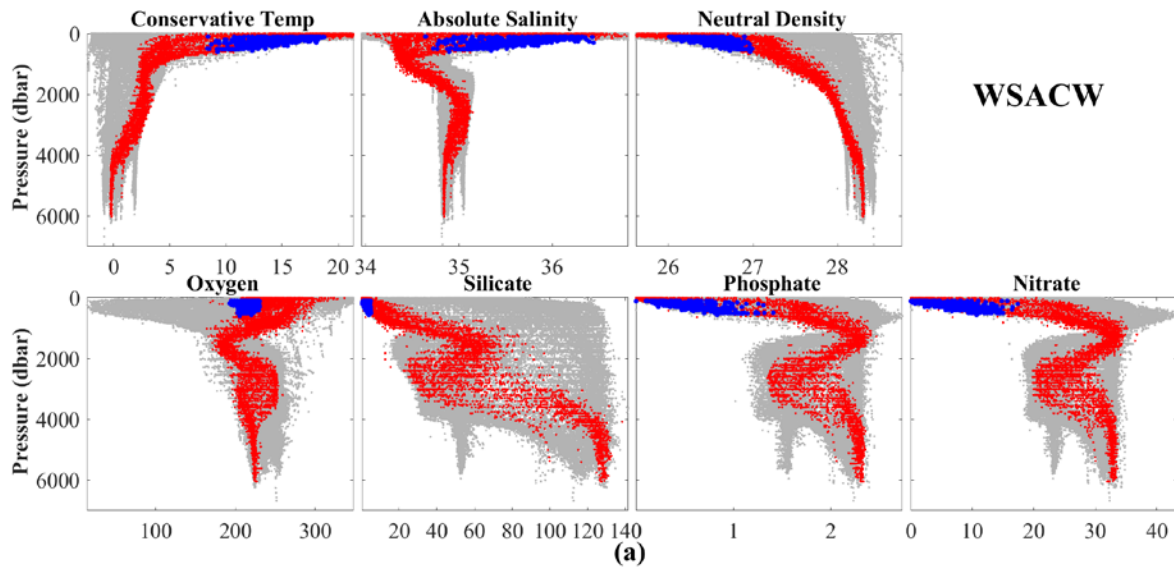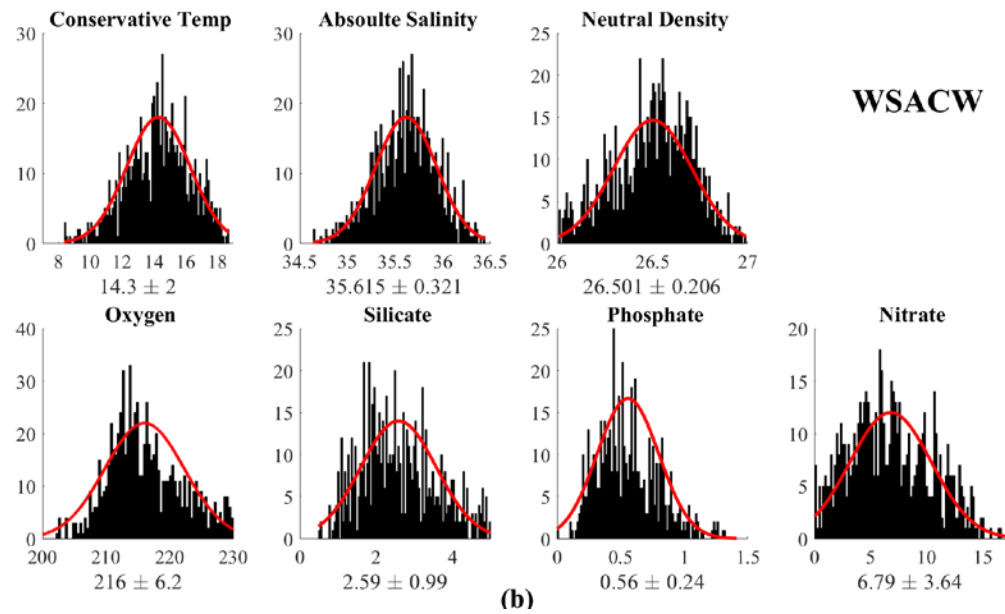

**Figure S3:** Definition of Western South Atlantic Central Water (WSACW): Panel a) the distribution of key properties vs. pressure; Panel b) bar plots of the data distribution of samples used to define the SWTs. Conservative Temperature ( $^{\circ}\text{C}$ ), Absolute Salinity ( $\text{g kg}^{-1}$ ), Neutral Density ( $\text{kg m}^{-3}$ ), Oxygen and Nutrients ( $\mu\text{mol kg}^{-1}$ ). The red Gaussian fit shows mean value and standard deviation of selected data.

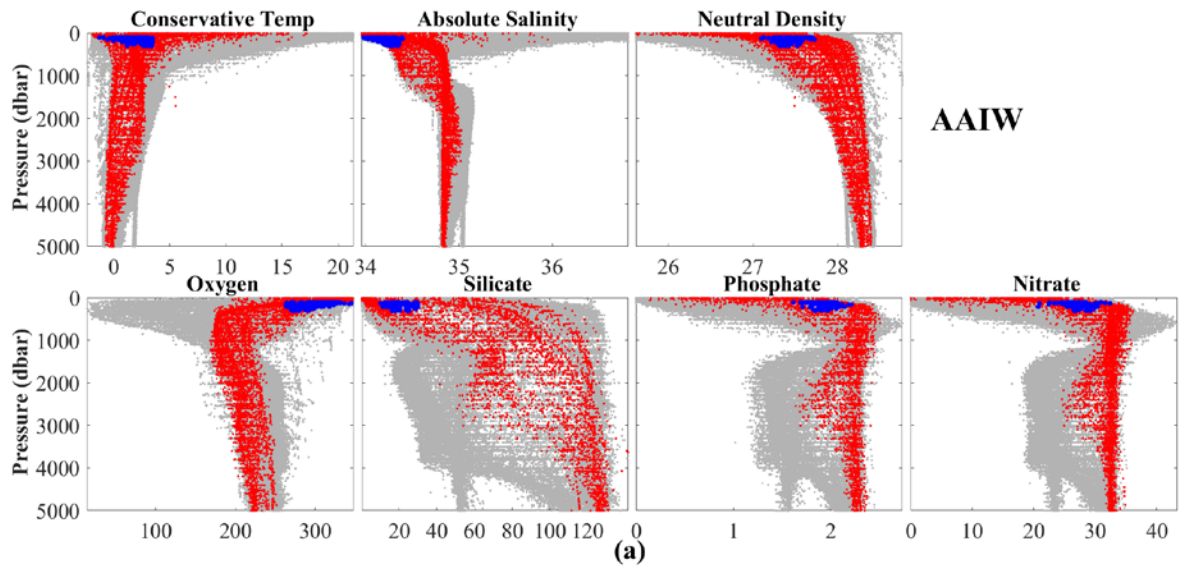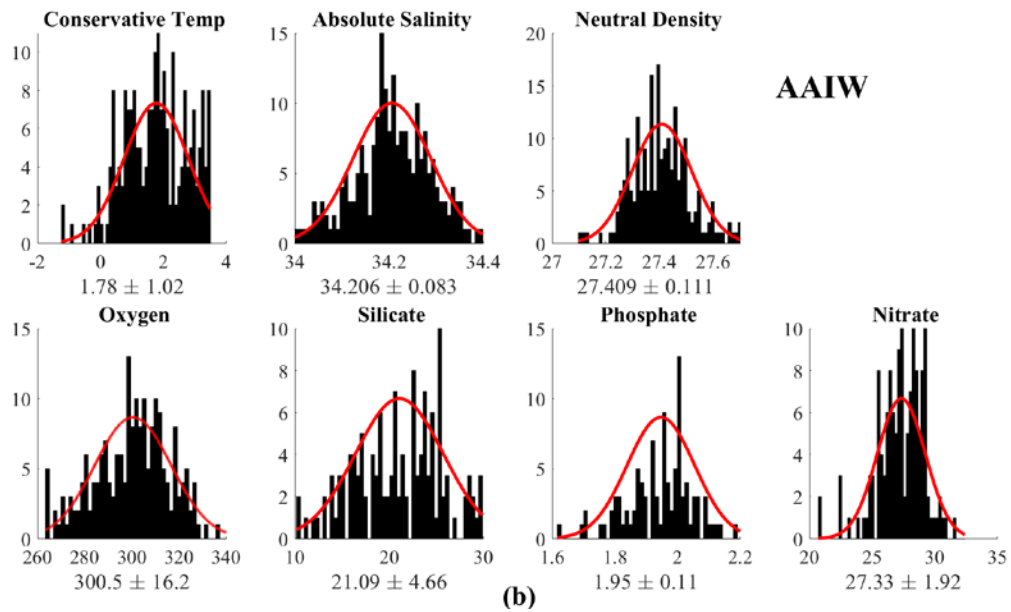

**Figure S4:** Definition of Antarctic Intermediate Water (AAIW): Panel a) the distribution of key properties vs. pressure; Panel b) bar plots of the data distribution of samples used to define the SWTs. Conservative Temperature ( $^{\circ}\text{C}$ ), Absolute Salinity ( $\text{g kg}^{-1}$ ), Neutral Density ( $\text{kg m}^{-3}$ ), Oxygen and Nutrients ( $\mu\text{mol kg}^{-1}$ ). The red Gaussian fit shows mean value and standard deviation of selected data.

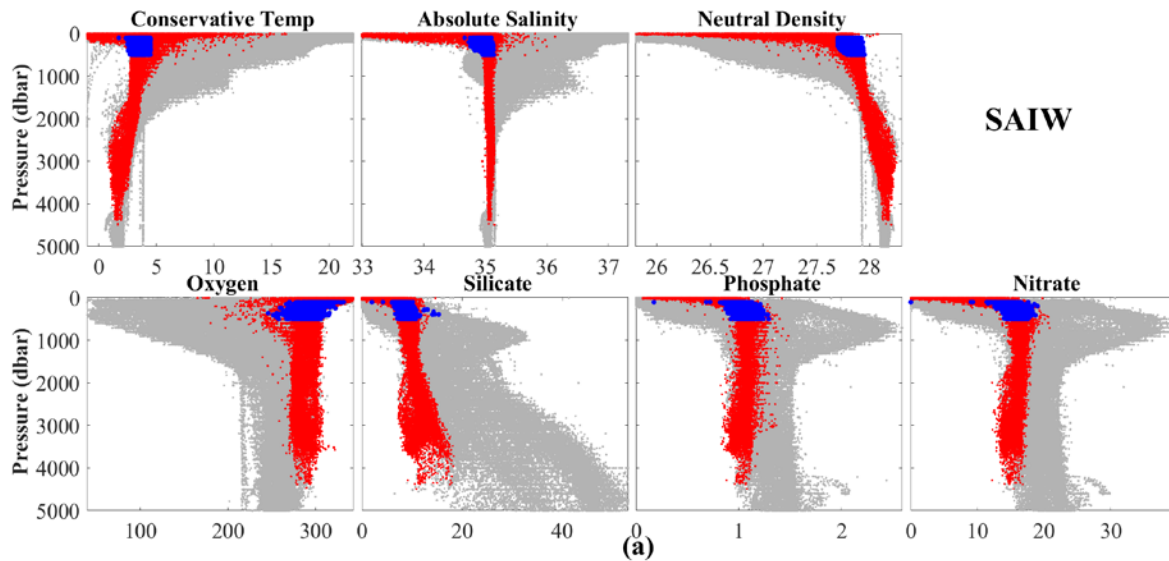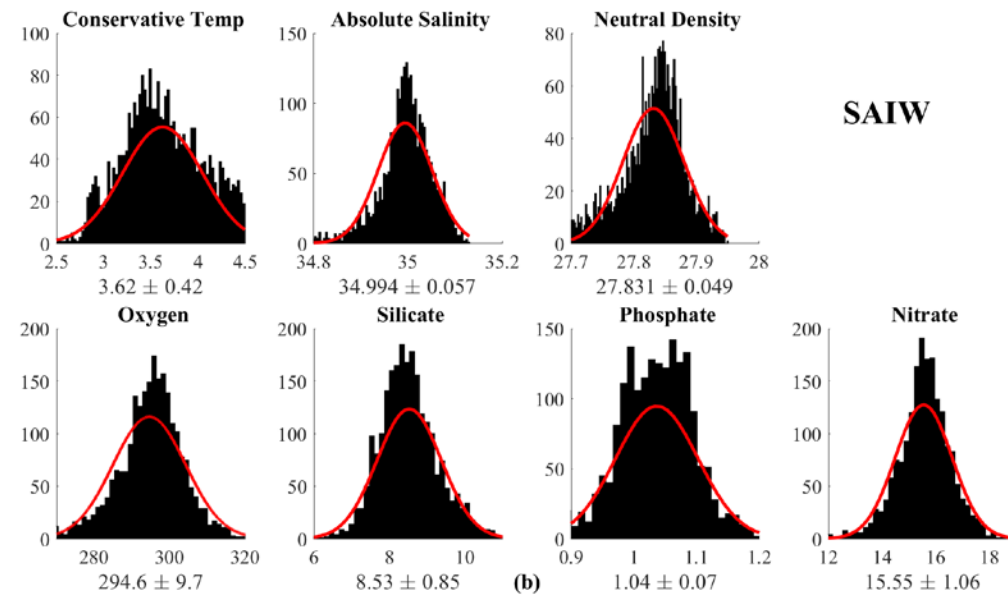

**Figure S5:** Definition of Subarctic Intermediate Water (SAIW): Panel a) the distribution of key properties vs. pressure; Panel b) bar plots of the data distribution of samples used to define the SWTs. Conservative Temperature ( $^{\circ}\text{C}$ ), Absolute Salinity ( $\text{g kg}^{-1}$ ), Neutral Density ( $\text{kg m}^{-3}$ ), Oxygen and Nutrients ( $\mu\text{mol kg}^{-1}$ ). The red Gaussian fit shows mean value and standard deviation of selected data

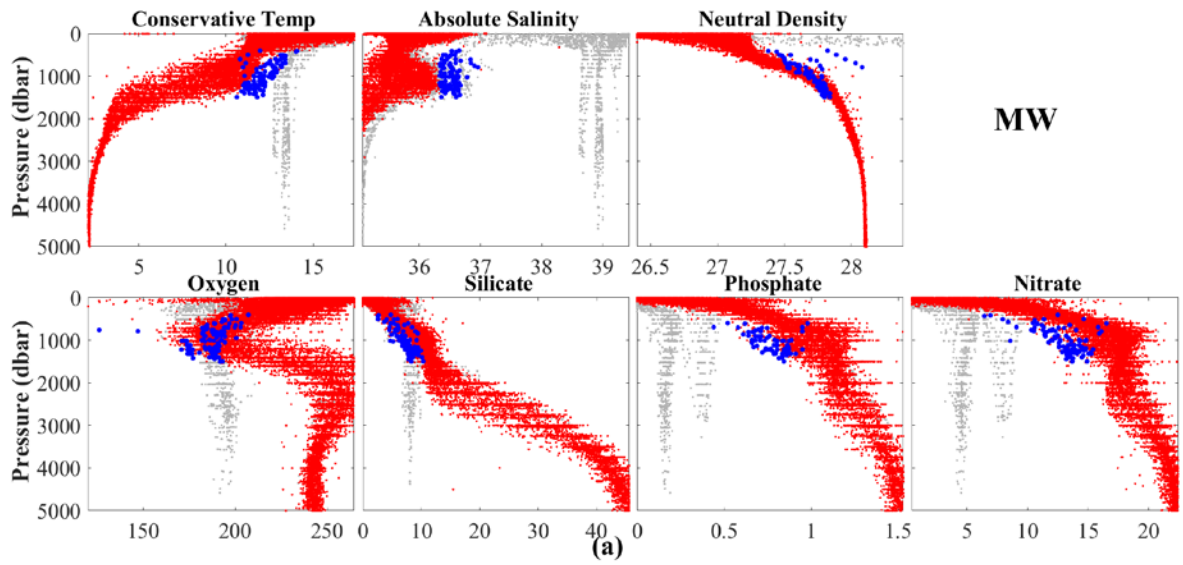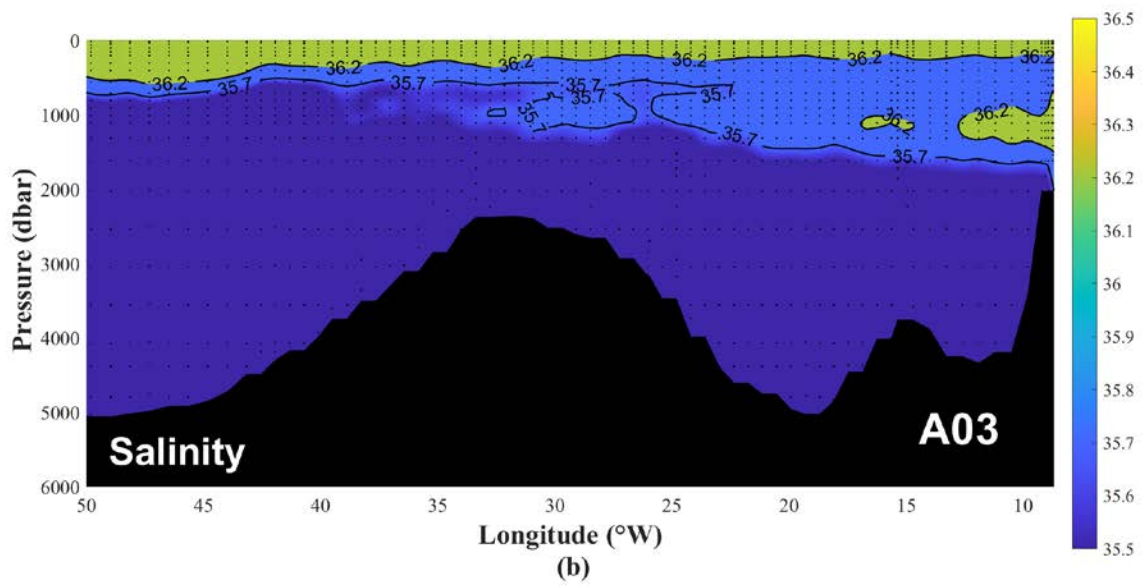

**Figure S6:** Definition of Mediterranean Water (MW): Panel a) the distribution of key properties vs. pressure; Panel b) Distribution of absolute salinity (SA) along the A03 cruise that shows the feature of MW.

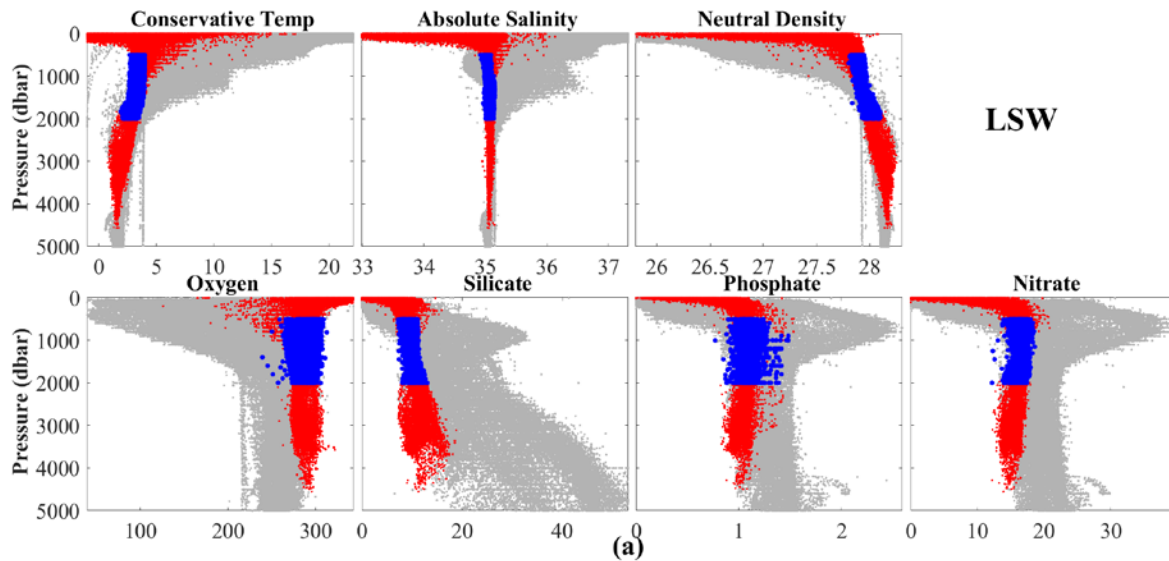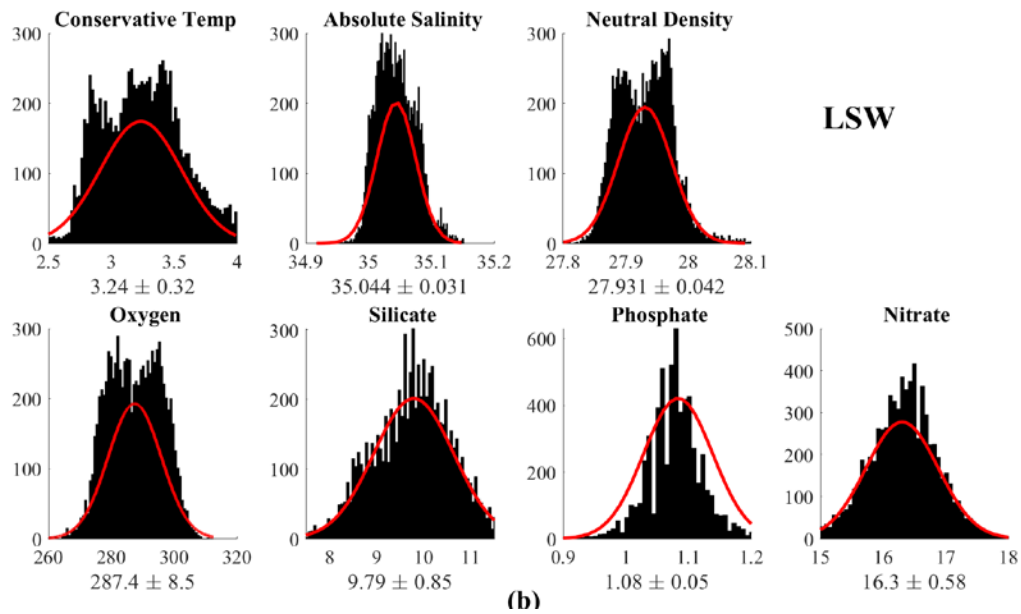

**Figure S7:** Definition of Labrador Sea Water (LSW): Panel a) the distribution of key properties vs. pressure; Panel b) bar plots of the data distribution of samples used to define the SWTs. Conservative Temperature ( $^{\circ}\text{C}$ ), Absolute Salinity ( $\text{g kg}^{-1}$ ), Neutral Density ( $\text{kg m}^{-3}$ ), Oxygen and Nutrients ( $\mu\text{mol kg}^{-1}$ ). The red Gaussian fit shows mean value and standard deviation of selected data.



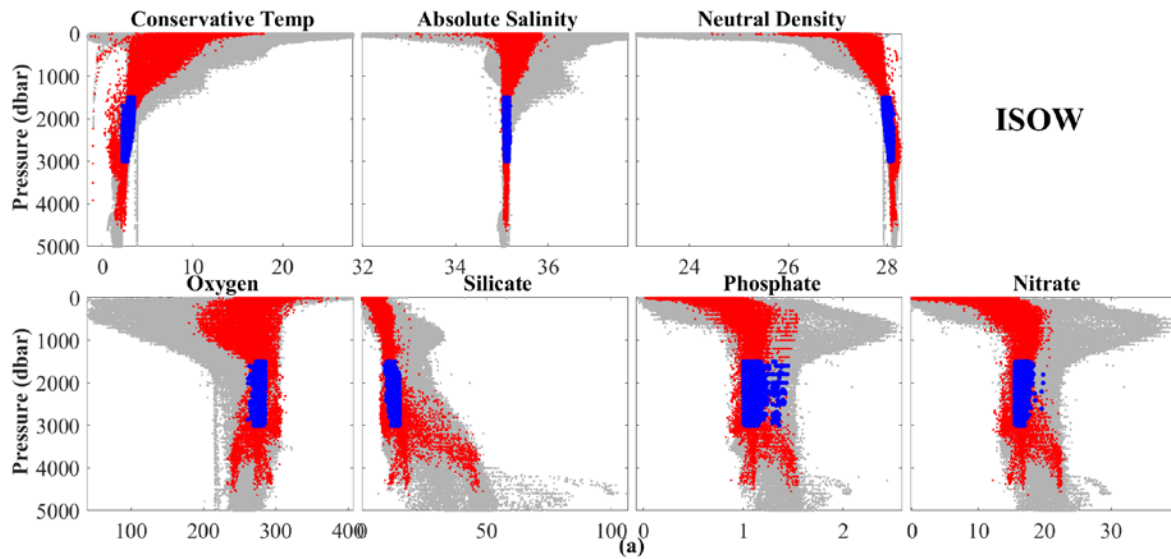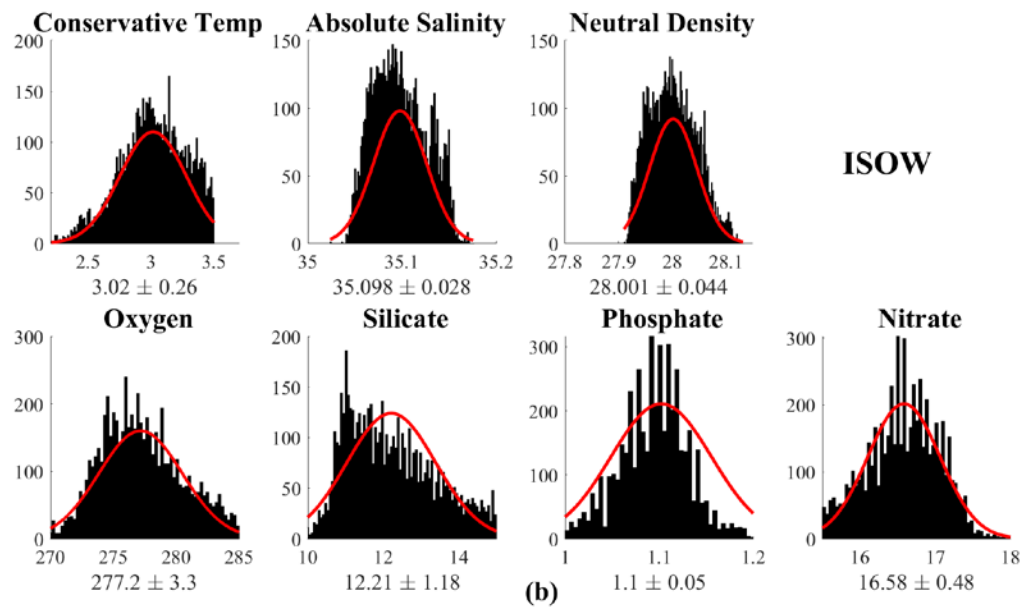

**Figure S8:** Definition of Iceland Scotland Overflow Water (ISOW): Panel a) the distribution of key properties vs. pressure; Panel b) bar plots of the data distribution of samples used to define the SWTs. Conservative Temperature ( $^{\circ}\text{C}$ ), Absolute Salinity ( $\text{g kg}^{-1}$ ), Neutral Density ( $\text{kg m}^{-3}$ ), Oxygen and Nutrients ( $\mu\text{mol kg}^{-1}$ ). The red Gaussian fit shows mean value and standard deviation of selected data.

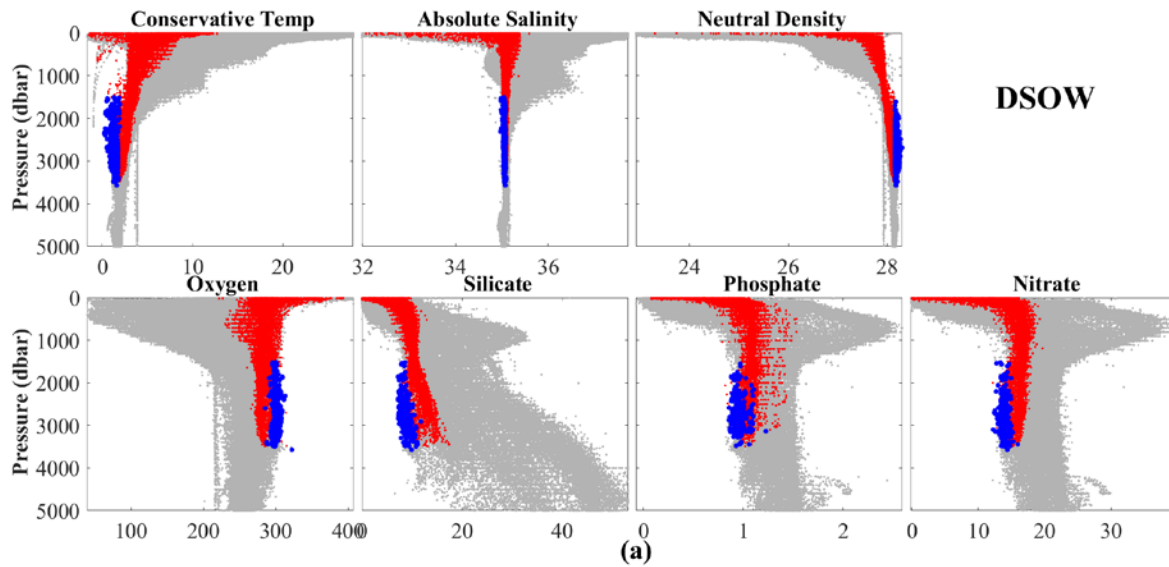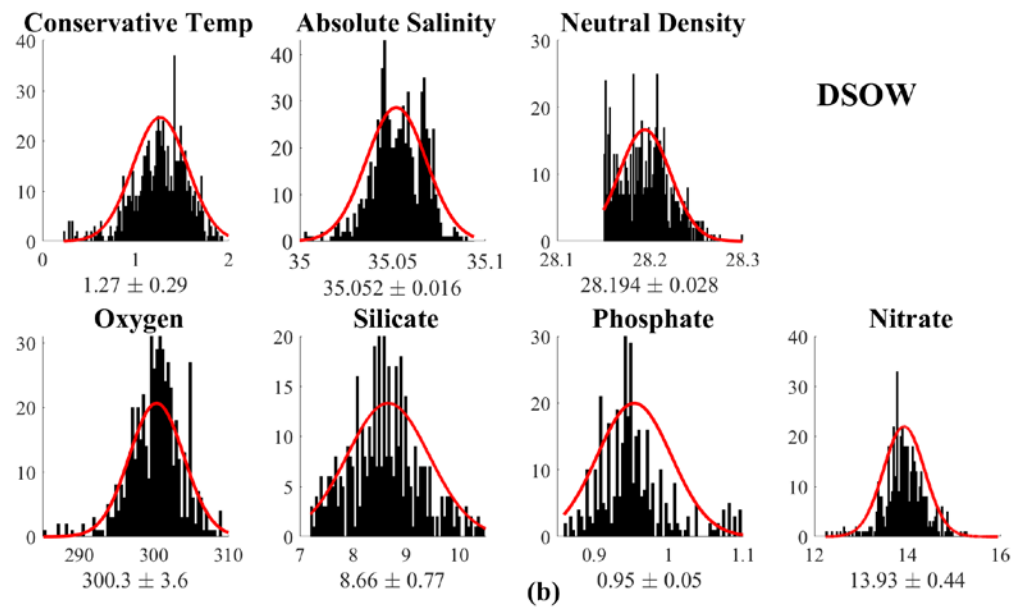

**Figure S9:** Definition of Denmark Strait Overflow Water (DSOW): Panel a) the distribution of key properties vs. pressure; Panel b) bar plots of the data distribution of samples used to define the SWTs. Conservative Temperature ( $^{\circ}\text{C}$ ), Absolute Salinity ( $\text{g kg}^{-1}$ ), Neutral Density ( $\text{kg m}^{-3}$ ), Oxygen and Nutrients ( $\mu\text{mol kg}^{-1}$ ). The red Gaussian fit shows mean value and standard deviation of selected data.

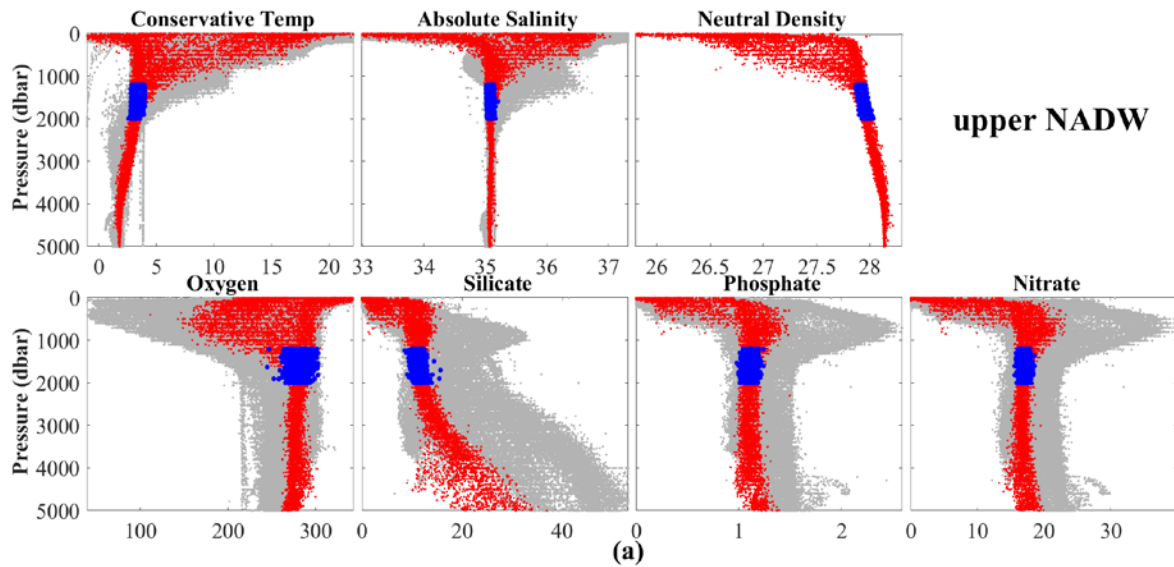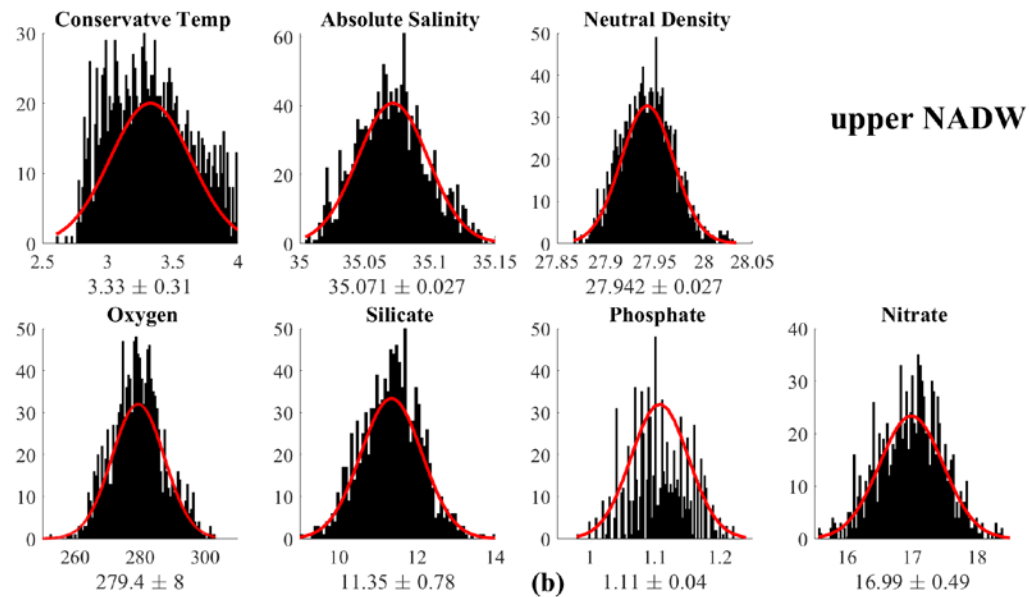

**Figure S10:** Definition of upper North Atlantic Deep Water (uNADW): Panel a) the distribution of key properties vs. pressure; Panel b) bar plots of the data distribution of samples used to define the SWTs. Conservative Temperature ( $^{\circ}\text{C}$ ), Absolute Salinity ( $\text{g kg}^{-1}$ ), Neutral Density ( $\text{kg m}^{-3}$ ), Oxygen and Nutrients ( $\mu\text{mol kg}^{-1}$ ). The red Gaussian fit shows mean value and standard deviation of selected data.

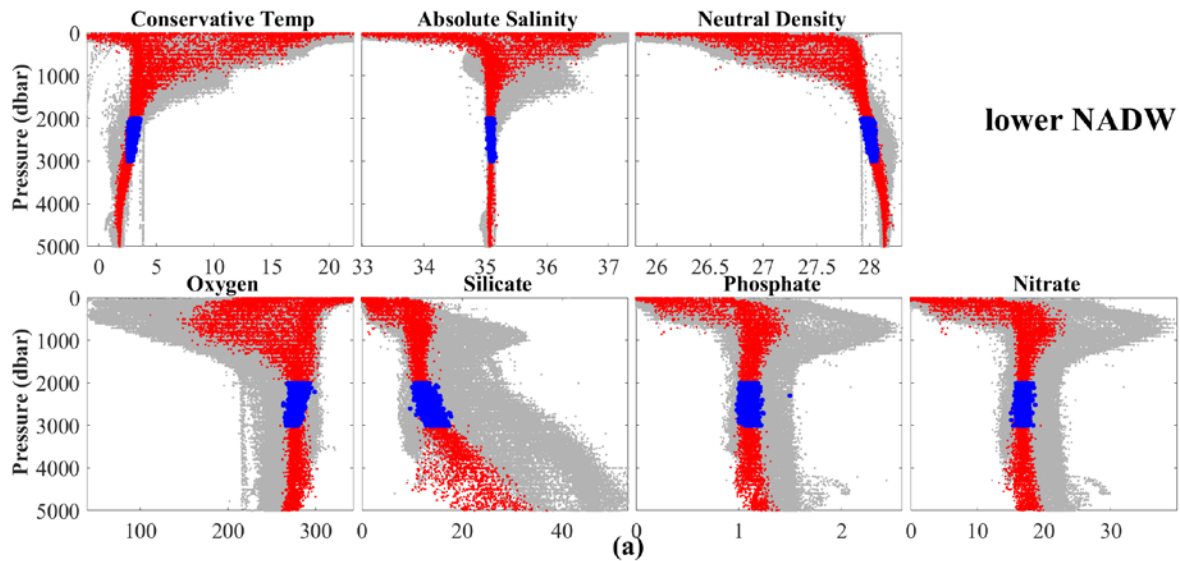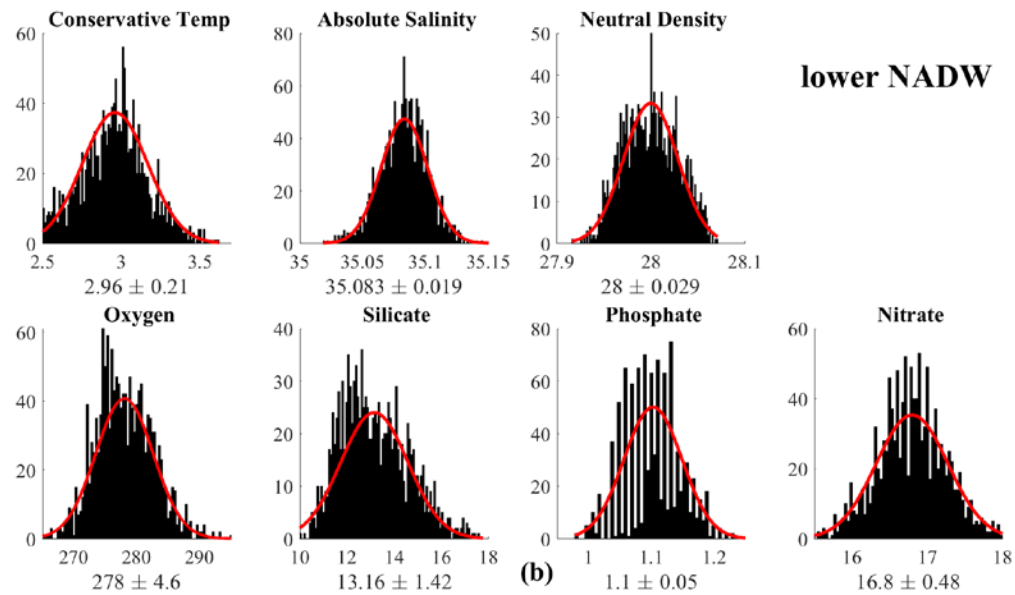

**Figure S11:** Definition of lower North Atlantic deep Water (INADW): Panel a) the distribution of key properties vs. pressure; Panel b) bar plots of the data distribution of samples used to define the SWTs. Conservative Temperature ( $^{\circ}\text{C}$ ), Absolute Salinity ( $\text{g kg}^{-1}$ ), Neutral Density ( $\text{kg m}^{-3}$ ), Oxygen and Nutrients ( $\mu\text{mol kg}^{-1}$ ). The red Gaussian fit shows mean value and standard deviation of selected data.

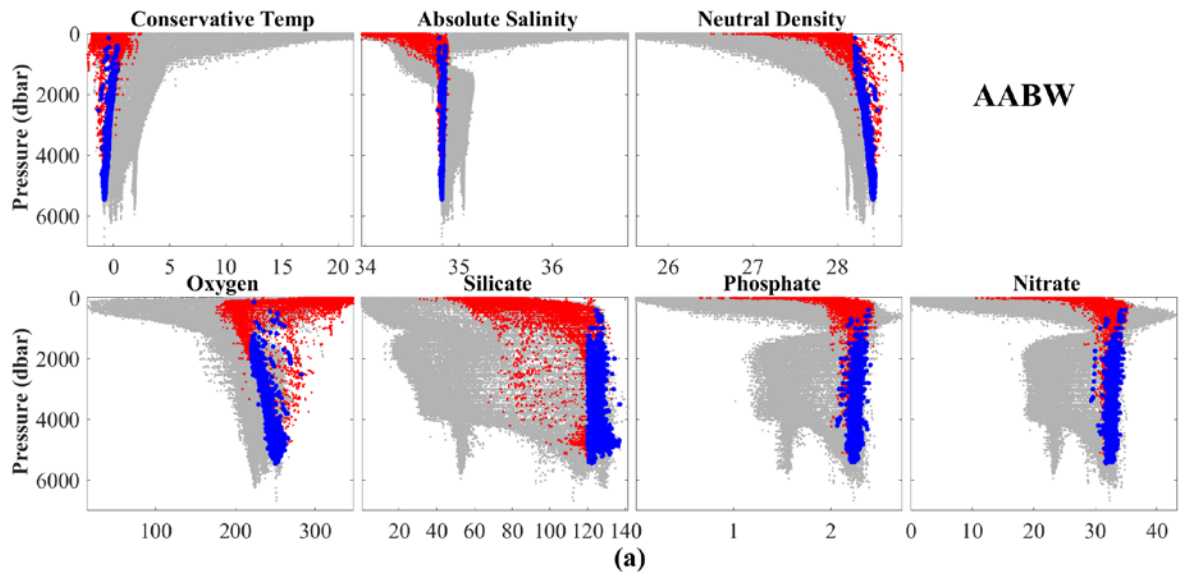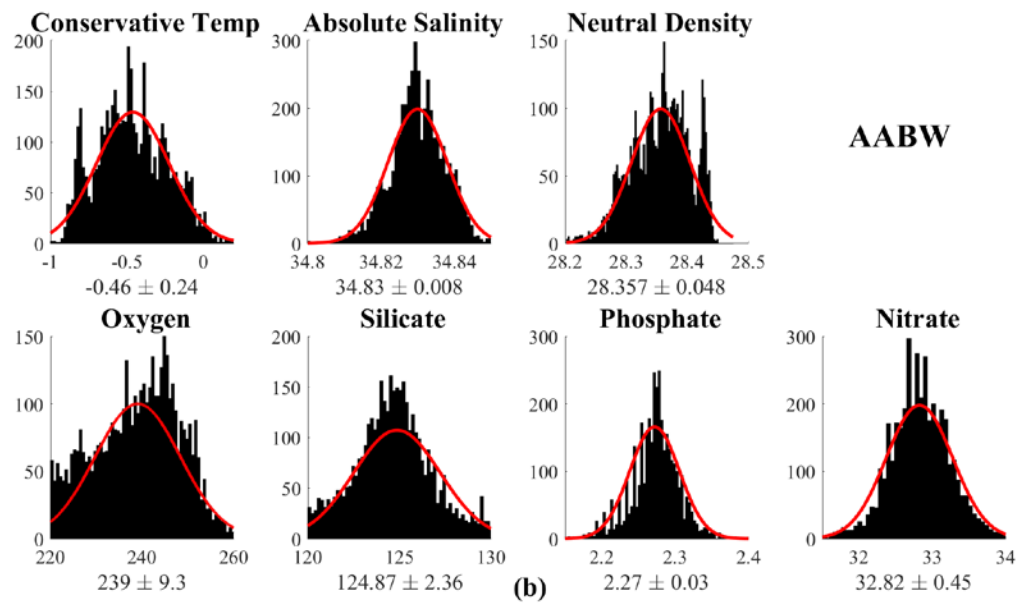

**Figure S12:** Definition of Antarctic Bottom Water (AABW): Panel a) the distribution of key properties vs. pressure; Panel b) bar plots of the data distribution of samples used to define the SWTs. Conservative Temperature ( $^{\circ}\text{C}$ ), Absolute Salinity ( $\text{g kg}^{-1}$ ), Neutral Density ( $\text{kg m}^{-3}$ ), Oxygen and Nutrients ( $\mu\text{mol kg}^{-1}$ ). The red Gaussian fit shows mean value and standard deviation of selected data.

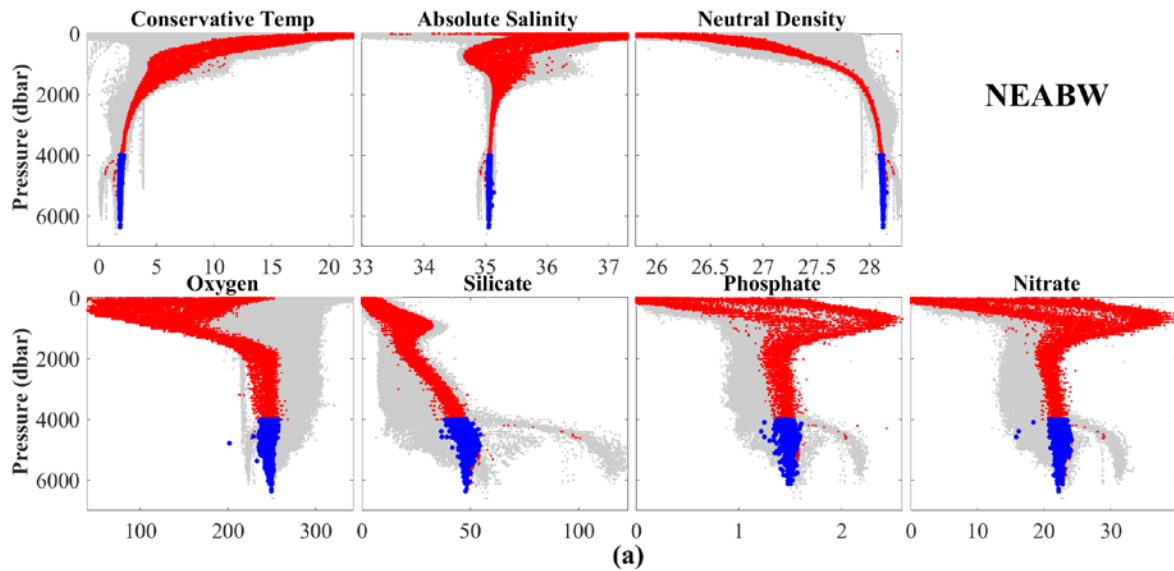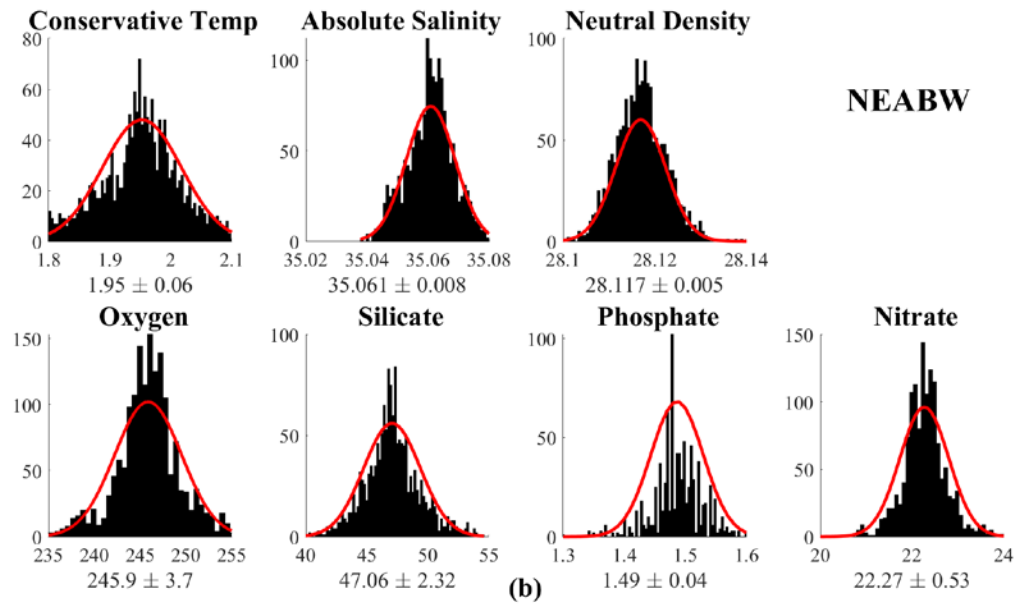

**Figure S13:** Definition of Northeast Atlantic Bottom Water (NEABW): Panel a) the distribution of key properties vs. pressure; Panel b) bar plots of the data distribution of samples used to define the SWTs. Conservative Temperature ( $^{\circ}\text{C}$ ), Absolute Salinity ( $\text{g kg}^{-1}$ ), Neutral Density ( $\text{kg m}^{-3}$ ), Oxygen and Nutrients ( $\mu\text{mol kg}^{-1}$ ). The red Gaussian fit shows mean value and standard deviation of selected data.

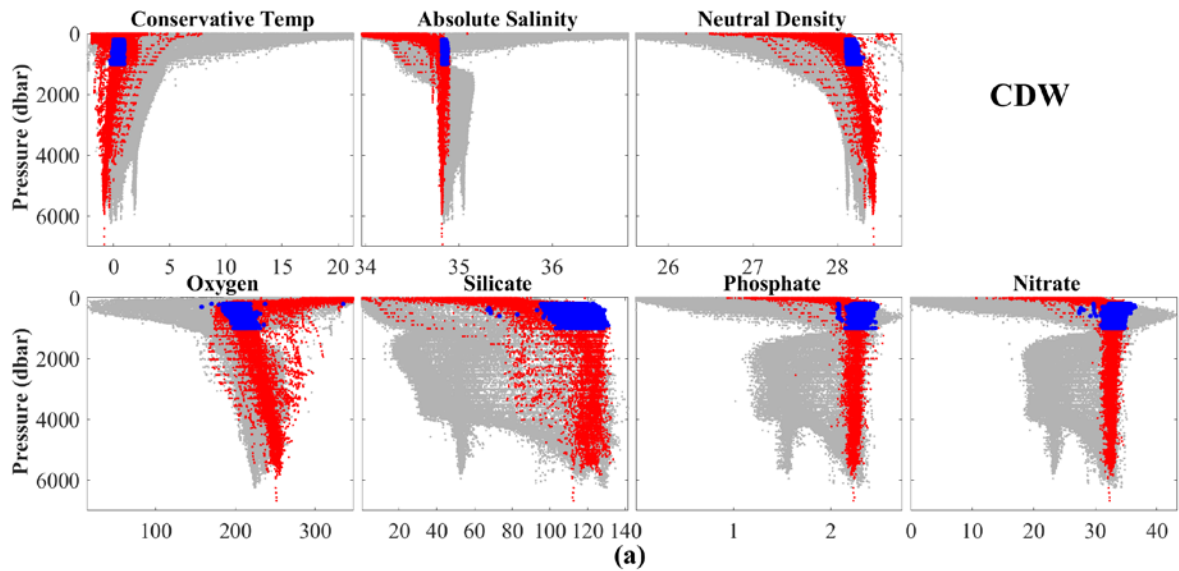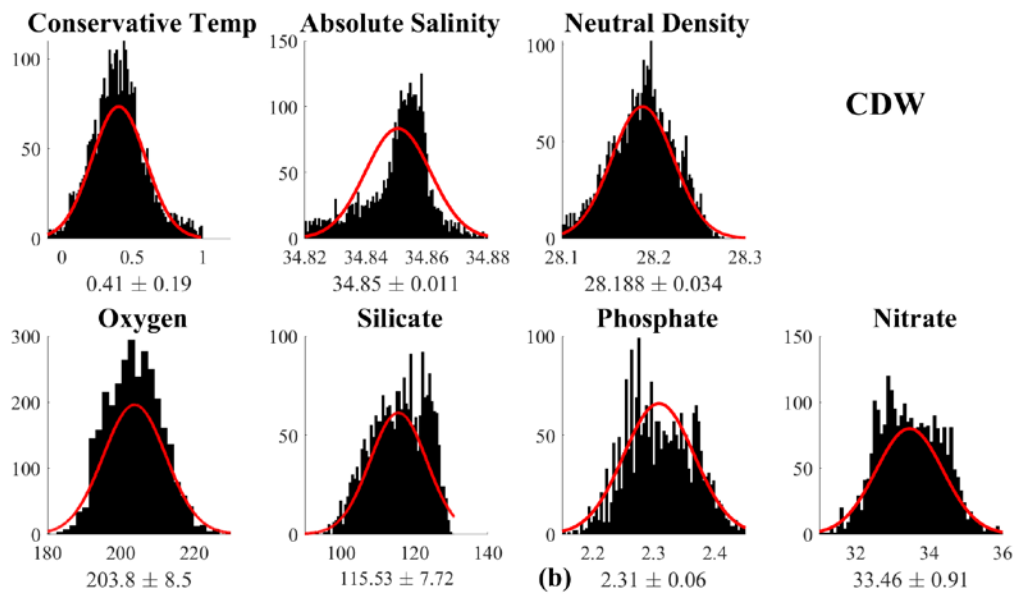

**Figure S14:** Definition of Circumpolar Deep Water (CDW): Panel a) the distribution of key properties vs. pressure, **b)** bar plots of the data distribution of samples used to define the SWTs. Conservative Temperature ( $^{\circ}\text{C}$ ), Absolute Salinity ( $\text{g kg}^{-1}$ ), Neutral Density ( $\text{kg m}^{-3}$ ), Oxygen and Nutrients ( $\mu\text{mol kg}^{-1}$ ). The red Gaussian fit shows mean value and standard deviation of selected data.

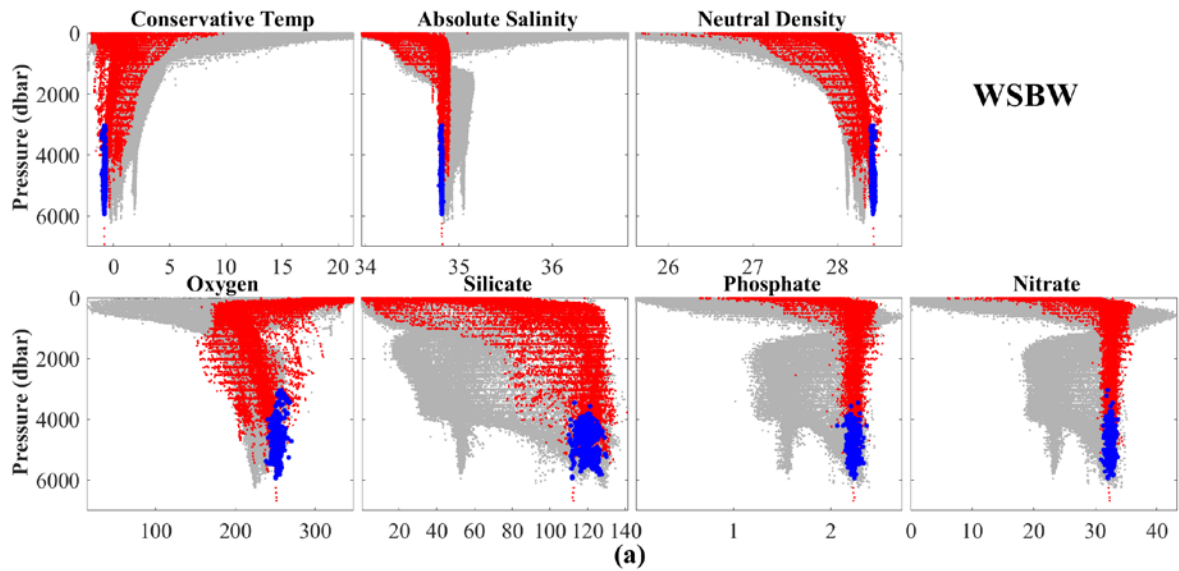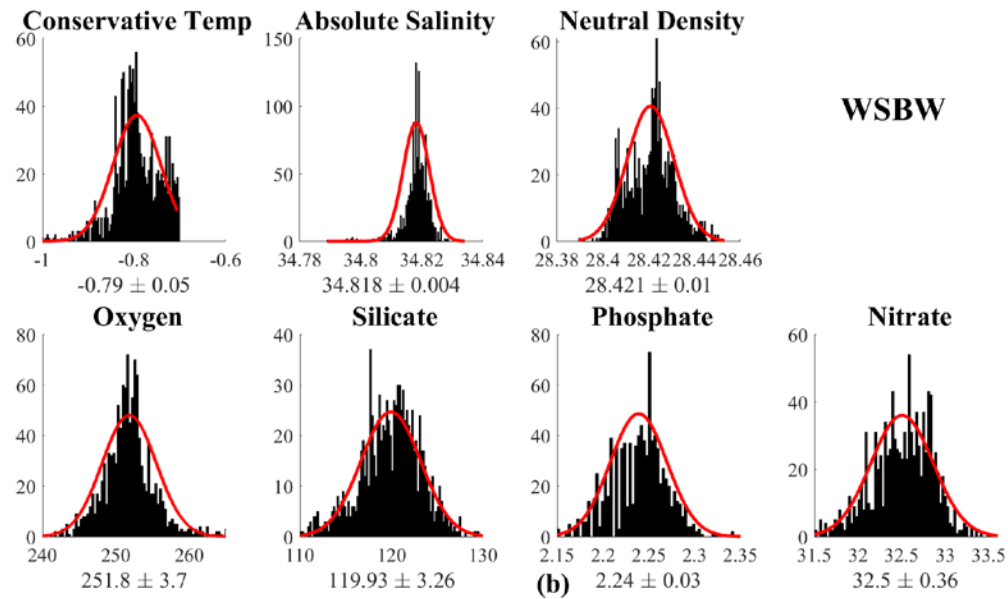

**Figure S15:** Definition of Weddell Sea Bottom Water (WSBW): Panel a) the distribution of key properties vs. pressure; Panel b) bar plots of the data distribution of samples used to define the SWTs. Conservative Temperature ( $^{\circ}\text{C}$ ), Absolute Salinity ( $\text{g kg}^{-1}$ ), Neutral Density ( $\text{kg m}^{-3}$ ), Oxygen and Nutrients ( $\mu\text{mol kg}^{-1}$ ). The red Gaussian fit shows mean value and standard deviation of selected data.
